# Supplementary material for: Characterization of Genotype–Phenotype Correlation With MORC2 Mutated Axonal Charcot–Marie–Tooth Disease in a Cohort of Chinese Patients
Source: Research Square preprint supplement (doi:10.21203/rs.3.rs-162301/v1), 2021-02-08
Supplement: Supplementary file 1 [file 66914dea50ecbf09d9876129.xlsx]

## Sheet: Sheet1
Table 1 Summarizes the characteristics of genotype and phenotype in all patients from three families
Patients	Nucleotide	AA	Sex	Age(y)	Age(y)	F H	Initial	Clinical features	Proximal	Laterality	Muscle strength		Sensory loss		Tendon Reflex		CMTNS	Additional
ID	change	change		at Onset	at Exam		symptoms		involvement		UL	LL	UL	LL	UL	LL		features
Family 1 IV 9	c.1397A>G	p.D466G	F	36	46	AD	Numless in hands	Hands weakness and atrophy Gait difficulties Distal dysaesthesia Foot drop	No	Left	4-/D	4/D	P,T,V/D	P,T,V/D	Decrease	Absent	18	Hands tremor hyperCKemia (1037 IU/L)
Family 1 III 5			M	30	68		Weakness in hands	Weakness and atrophy in distal limbs Distal dysaesthesia Pes cavus, Foot drop	Yes	-	4/P;3/D	3/P;2/D	P,T,V/D	P,T,V/D	Absent	Absent	32	hyperCKemia (958 IU/L)
Family 1 IV 7			F	27	51		Weakness in hands	Weakness and atrophy in distal limbs Distal dysaesthesia Pes cavus, Foot drop	Yes	Left	4+/P;4-/D	4+/P;4-/D	P,T,V/D	P,T,V/D	Decrease	Absent	29	Hands tremor hyperCKemia (869 IU/L)
Family 1 IV 11			F	28	38		Numless in hands	Weakness and atrophy in distal limbs Distal dysaesthesia Foot drop	No	-	4/D	4/D	P,T,V/D	P,T,V/D	Decrease	Absent	25	Hands tremor hyperCKemia (736 IU/L)
Family 1 V 2			F	25	27		Hands tremor	Hands weakness and atrophy Gait difficulties Distal dysaesthesia	No	-	4/D	4/D	P,T,V/D	P,T,V/D	Decrease	Decrease	14	HyperCKemia (1639 IU/L)
Family 1 V 3			M	19	19		-	Slight weakness and atrophy in both hands	No	-	5-/D	5-/D	P,T/D	P,T/D	Decrease	Decrease	4	HyperCKemia (495 IU/L)
Family 2 II 1	c.260C>T	p.S87L	F	<1	7	SF	Moter develop delay	Generalized weakness and atrophy Dysarthria Scoliosis Claw hand Flat feet	Yes	-	3/P;4/D	2/P;2/D	P,T,V/D	P,T,V/D	Absent	Absent	31	Cerebellar hypoplasia mental retardation
Family 3 II 2	c.754C>T	p.R252W	F	<1	10	SF	Moter develop delay	Weakness in distal lower limbs steppage gait pes cavus strephenopodia	No	-	5/D	4/D	P,T/D	P,T/D	Decrease	Absent	10	-
Family 3 II 3			F	6	10	SF	Foot deformity abnormal gait	Mild gait disturbance	No	-	5/D	5-/D	-	-	Decrease	Decrease	2	-
Family 4 II 2	c.1220G>A	p.C407Y	M	6	19	SF	Motor difficulty	Weakness and atrophy in distal limbs Distal dysaesthesia Foot deformity Hammer toes	No	-	4/D	3+/P;2/D	P,T/D	P,T/D	Decrease	Decrease	20	-
F = Female;M = Male; CMTNS = Charcot-Marie-Tooth neuropathy score;FH = Family History;AD =autosomal dominant inheritance ;SF = Sporadic families;UL =Upper limbs;LL = Lower limbs;P = Proximal; D = Distal; P= pinprick; V = vibratory;T = Touch.
