# Supplementary material for: Characterization of Genotype–Phenotype Correlation With MORC2 Mutated Axonal Charcot–Marie–Tooth Disease in a Cohort of Chinese Patients
Source: Research Square preprint supplement (doi:10.21203/rs.3.rs-162301/v1), 2021-02-08
Supplement: Supplementary file 2 [file 6db41f76f549e6f28fca9417.xlsx]

## Sheet: Sheet1
Table 2 Electrophysiological features in affected members of three families
	Family 1-IV9			Family 1-V2			Family 1-V3			Family 2 II-1			Family 3 II-2			Family 3 II-3			Family 4 II-2
Nerve	MCV,m/s	DL,ms	CMAP,mV	MCV,m/s	DL,ms	CMAP,mV	MCV,m/s	DL,ms	CMAP,mV	MCV,m/s	DL,ms	CMAP,mV	MCV,m/s	DL,ms	CMAP,mV	MCV,m/s	DL,ms	CMAP,mV	MCV,m/s	DL,ms	CMAP,mV
Median
E-W	62.5	6.36	3.50↓	55.3	6.42	4.00↓	56.1	6.64	13.5	28.3↓	7.8	0.60↓	48.8	7.1	10	48.8	7.4	10.5	50.1	9.9	1.16↓
W-APB		3.24	4.90↓		2.68	6.71↓		2.81	14.2		3.2	1.60↓		2.9	11.5		3.2	10.4		5.71↑	1.22↓
Ulnar
E-W	63.6	5.48	17	58.1	5.84	11.6	57.1	6.2	13.4	52.9	5.9	0.10↓	50	6.3	7.3	42.5	6.3	7.6	42.9	7.57	0.38↓
W-ADM		2.57	17.2		2.57	13.1		2.52	14		2.5	0.10↓		2	7.9		1.83	8.6		3.96↑	0.50↓
Tibial
K-A	49.4	10.8	7	43.4	11.7	2.60↓	53.1	11.4	13.9	35.10↓	9.4	0.30↓	41.3	10.2	8.5	39.7	11.4	8.2	36.50↓	15.1	1.37↓
A-FHB		3.1	10.3		2.83	3.30↓		3.96	13.6		3.7	0.20↓		2.7	10.8		2.7	11.3		4.68	2.10↓
Peroneal
K-A	48.1	8.84	1.22↓	36.90↓	12.6	0.10↓	56	10.4	10.3	40.00↓	6.8	0.10↓	42.1	14.9	0.30↓	46.4	11.5	1.10↓	NR	NR	NR
A-EDB		2.81	1.31↓		4.75	0.13↓		3.45	12.9		2.8	0.14↓		7.3	0.20↓		4.4	1.30↓		NR	NR
	SCV,m/s	DL,ms	SNAP,µV	SCV,m/s	DL,ms	SNAP,µV	SCV,m/s	DL,ms	SNAP,µV	SCV, m/s	DL, ms	SNAP,µV	SCV, m/s	DL, ms	SNAP,µV	SCV, m/s	DL, ms	SNAP,µV	SCV, m/s	DL, ms	SNAP,µV
Median
Dig I-W	NR	NR	NR	37.00↓	3.84	1.55↓	45.60↓	2.54	1.12↓	NR	NR	NR	50	2	8.8	56.2	1.69	11	NR	NR	NR
Ulnar
Dig V-W	NR	NR	NR	30.70↓	3.26	1.34↓	45.90↓	2.66	0.63↓	NR	NR	NR	ND	ND	ND	ND	ND	ND	NR	NR	NR
Peroneus
Dig I-Ankle	NR	NR	NR	NR	NR	NR	34.40↓	4.88	0.52↓	NR	NR	NR	41.4	1.69	9.3	45.8	1.42	5.2	NR	NR	NR
Needle EMG
abductor pollicis brevis	chronic neurogenic			Chronic neurogenic Spontanous potential			chronic neurogenic			Chronic neurogenic Spontanous potential			ND			ND			ND
musculus biceps brachii	Chronic neurogenic			Chronic neurogenic Spontanous potential			chronic neurogenic			Chronic neurogenic Spontanous potential			ND			ND			ND
abductor digiti minimi	Satellite potential			ND			ND			ND			ND			ND			ND
Tibialis anterior	Chronic neurogenic			Chronic neurogenic Spontanous potential			chronic neurogenic			Chronic neurogenic Spontanous potential			ND			ND			ND
Quadriceps	Chronic neurogenic			Chronic neurogenic Spontanous potential			ND			Chronic neurogenic Spontanous potential			ND			ND			ND
Abbreviations: A = ankle; ADM = abductor digiti minimi; APB = abductor pollicis brevis; CMAP =compound muscle action potential; DL = distal latency; Dig = digit; E = elbow; EDB = extensor digitorum brevis; FHB = flexor hallucis brevis; K = knee; MCV =motor conduction velocity; SCV = sensory conduction velocity; SNAP = sensory nerve action potential; W = wrist. NR=no response ND=not done.
