# Supplementary material for: Characterization of Genotype–Phenotype Correlation With MORC2 Mutated Axonal Charcot–Marie–Tooth Disease in a Cohort of Chinese Patients
Source: Research Square preprint supplement (doi:10.21203/rs.3.rs-162301/v1), 2021-02-08
Supplement: Supplementary file 3 [file 92bd0880fcfd3f78c4083027.xlsx]

## Sheet: Sheet1
Table 3 Summary of the molecular consequences of neuropathic and structure-based mutants of MORC2
Mutation	Activity relative to wild-type MORC2		Position in structure	Proposed mechanism of MORC2 misregulation
	ATPase	HUSH
S87L	Lower	Higher	ATP lid	Constitutive N-terminal dimerization
R132L	Not determined	Not determined	ATPase core	Destabilize ATPase
E236G	Not determined	Not determined	ATPase core	Destabilize ATPase
R252W	Lower	Higher	ATPase-CW interface	Destabilize ATPase-CW module
Q400R	Not determined	Not determined	ATPase core	Destabilize ATPase
T424R	Higher	Lower	Dimer interface	Perturb dimerization dynamics
D466N	Not determined	Not determined	ATPase surface	Destabilize ATPase
